# Supplementary material for: Genetic associations with parental investment from conception to wealth inheritance in six cohorts
Source: PubMed Central journal article supplement (PMC10444618; doi:10.1038/s41562-023-01618-5), 2023-06-29
Supplement: 41562_2023_1618_MOESM1_ESM.pdf [file 41562_2023_1618_MOESM1_ESM.pdf]

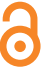

---

# Genetic associations with parental investment from conception to wealth inheritance in six cohorts

---

In the format provided by the authors and unedited

1 **Online-only material**

2 Wertz et al., Genetic associations with parental investment from conception to wealth  
3 inheritance in six cohorts

4

5 **SUPPLEMENTARY METHODS ..... 2**

6 **1. Description of cohorts..... 2**

7 1.1. The Environmental Risk (E-Risk) Longitudinal Twin Study ..... 2

8 1.2. The Dunedin Study ..... 3

9 1.3. The Avon Longitudinal Study of Parents and Children (ALSPAC) Study ..... 3

10 1.4. The UK Millennium Cohort Study (MCS) ..... 4

11 1.5. The Health and Retirement Study (HRS) ..... 5

12 1.6. The Wisconsin Longitudinal Study (WLS) ..... 5

13 **2. Genotyping..... 5**

14 2.1. The E-Risk cohort ..... 5

15 2.2. The Dunedin cohort ..... 6

16 2.3. The ALSPAC cohort..... 6

17 2.4. The MCS cohort..... 6

18 2.5. The HRS cohort ..... 7

19 2.6. The WLS cohort..... 7

20 **3. Polygenic scoring..... 8**

21 **4. Description of measures ..... 8**

22 4.1. Prenatal period ..... 8

23 4.2. Infancy ..... 9

24 4.3. Childhood..... 9

25 4.4. Adolescence ..... 13

26 4.5. Adulthood ..... 14

27 **5. Statistical analyses ..... 15**

28 **SUPPLEMENTARY FIGURES..... 17**

29 **Supplementary Figure 1..... 17**

30 **Supplementary Figure 2..... 19**

31 **SUPPLEMENTARY TABLES..... 20**

32 **Supplementary Table 1..... 20**

33 **Supplementary Table 2..... 22**

34 **Supplementary Table 3..... 23**

35 **Supplementary Table 4..... 24**

36 **SUPPLEMENTARY REFERENCES..... 26**

37

## 38 SUPPLEMENTARY METHODS

39

### 40 1. Description of cohorts

41

#### 42 1.1. The Environmental Risk (E-Risk) Longitudinal Twin Study

43

44 The E-Risk Study tracks the development of a birth cohort of 2,232 British participants.  
45 The sample was drawn from a larger birth register of twins born in England and Wales in 1994-  
46 1995<sup>1</sup>. Full details about the sample are reported elsewhere.<sup>2</sup> Briefly, the E-Risk sample was  
47 constructed in 1999-2000, when 1,116 families (93% of those eligible) with same-sex 5-year-old  
48 twins participated in home-visit assessments. This sample comprised 56% monozygotic (MZ)  
49 and 44% dizygotic (DZ) twin pairs; sex was evenly distributed within zygosity (49% male).  
50 Families were recruited to represent the UK population of families with newborns in the 1990s,  
51 on the basis of residential location throughout England and Wales and mother's age. Teenaged  
52 mothers with twins were over-selected to replace high-risk families who were selectively lost to  
53 the register through non-response. Older mothers having twins via assisted reproduction were  
54 under-selected to avoid an excess of well-educated older mothers. The study sample represents  
55 the full range of socioeconomic conditions in the UK, as reflected in the families' distribution on  
56 a neighbourhood-level socioeconomic index (ACORN [A Classification of Residential  
57 Neighbourhoods], developed by CACI Inc. for commercial use);<sup>3</sup> 25.6% of E-Risk families lived  
58 in "wealthy achiever" neighbourhoods compared to 25.3% nationwide; 5.3% vs. 11.6% lived in  
59 "urban prosperity" neighbourhoods; 29.6% vs. 26.9% lived in "comfortably off"  
60 neighbourhoods; 13.4% vs. 13.9% lived in "moderate means" neighbourhoods, and 26.1% vs.  
61 20.7% lived in "hard-pressed" neighbourhoods. E-Risk underrepresents "urban prosperity"  
62 neighbourhoods because such households are likely to be childless.

63 Home-visits assessments took place when participants were aged 5, 7, 10, 12 and, most  
64 recently, 18 years, when 93% of the participants took part. At ages 5, 7, 10, and 12 years,  
65 assessments were carried out with participants as well as their mothers (or primary caretakers);  
66 the home visit at age 18 included interviews only with participants. Each twin was assessed by a  
67 different interviewer. These data are supplemented by searches of official records and by  
68 questionnaires that are mailed, as developmentally appropriate, to teachers, and co-informants  
69 nominated by participants themselves. The Joint South London and Maudsley and the Institute of  
70 Psychiatry Research Ethics Committee approved each phase of the study. Parents gave informed  
71 consent and twins gave assent between 5-12 years and then informed consent at age 18.

72 For our analyses the sample was restricted to participants of European-descent who had  
73 polygenic score data (n=880 mothers). This sample size reduces for individual analyses due to  
74 missing data; the n for each analysis is reported in the measures description below and in the  
75 respective Tables/Figures. Similarly, not all genotyped mothers also had genotyped children;  
76 thus, for our analyses including children's polygenic score, the sample size reduces to n= 860  
77 genotyped mother-child dyads.

78

79 1.2. The Dunedin Study

80

81 Dunedin participants were members of the Dunedin Multidisciplinary Health and  
82 Development Study, a longitudinal investigation of health and behaviour in a birth cohort.  
83 Dunedin participants (N 1,037; 91% of eligible births; 52% male) were all individuals born  
84 between April 1972 and March 1973 in Dunedin, New Zealand, who were eligible on the basis  
85 of residence in the province and who participated in the first assessment at age 3. Full details  
86 about the sample are reported elsewhere.<sup>4</sup> The cohort represented the full range of  
87 socioeconomic status (SES) in the general population of New Zealand's South Island. On adult  
88 health, the cohort matches the New Zealand National Health and Nutrition Surveys on key health  
89 indicators (e.g., body mass index, smoking, visits to the doctor). Assessments with Dunedin  
90 participants were carried out at birth and ages 3, 5, 7, 9, 11, 13, 15, 18, 21, 26, 32, 38, and, most  
91 recently, 45 years. All but one of the assessments have enjoyed participation rates well above  
92 90%.<sup>4</sup> The study was approved by the New Zealand Southern Health and Disability Ethics  
93 Committee and the Duke Campus Institutional Review Board. Written informed consent was  
94 obtained from all participants.

95 In 1994, when Dunedin participants were between 21 and 22 years old, a study of their  
96 parenting behaviour was initiated (the Parenting Study).<sup>5</sup> By 2017, when Dunedin participants  
97 were 44 – 45 years old, N 702 had participated in the parenting study, of N 738 cohort members  
98 eligible for participation based on their having a 3-year-old child (participation rate: 95%). For  
99 the majority of participants, the child they participated in the study with was their first-born  
100 (91%) biological child (97%). Dunedin study participant-parents and their children were visited  
101 in their home by an interviewer who conducted systematic observations of the home  
102 environment and who videotaped the parent interacting with his or her child. Children were  
103 observed when they were on average 3.3 years old, with 59% seen within 2 months of their third  
104 birthday (SD 0.5 years; range 2.1– 6.8 years). On average, parents were 33 years old at the time  
105 of the assessment (SD 5.7 years; range 21.5– 44.7 years). All dyad pairs (i.e., mother/son,  
106 mother/daughter, father/son, father/daughter) were equally represented.

107 For our analyses the sample was restricted to participants of European-descent who had  
108 polygenic score data (n=654; n=338 mothers and n=316 fathers). This sample size reduces for  
109 individual analyses due to missing data; the n for each analysis is reported in the measures'  
110 description below and in the respective Tables/Figures.

111

112 1.3. The Avon Longitudinal Study of Parents and Children (ALSPAC) Study

113

114 The Avon Longitudinal Study of Parents and Children (ALSPAC) is an ongoing longitudinal  
115 birth cohort study which started in the early 1990s. Recruitment and retention over time is  
116 described in detail elsewhere.<sup>6,7</sup> Briefly, all pregnant women living in Bristol, UK, and  
117 surrounding areas, with an expected delivery date between April 1, 1991 and Dec 31, 1992 were

118 eligible for inclusion. Of 14 541 pregnancies, 13 988 children were alive at 12 months. About  
119 85% of eligible expectant mothers participated. When the oldest children were approximately 7  
120 years of age, an attempt was made to bolster the initial sample with eligible cases who had failed  
121 to join the study originally, resulting in an additional 913 children being enrolled. Data collection  
122 was by postal questionnaires and regular ‘focus’ clinics, as previously described.<sup>6,7</sup> This study  
123 uses data collected up to age 16. Detailed information about ALSPAC is available online  
124 [www.bris.ac.uk/alspac](http://www.bris.ac.uk/alspac). The study website contains details of all the data that are available  
125 through a fully searchable data dictionary and variable search tool  
126 (<http://www.bristol.ac.uk/alspac/researchers/our-data/>). Ethical approval for the study was  
127 obtained from the ALSPAC Law and Ethics Committee and the Local Research Ethics  
128 Committees. Informed consent for the use of data collected via questionnaires and clinics was  
129 obtained from participants following the recommendations of the ALSPAC Ethics and Law  
130 Committee at the time. Consent for biological samples has been collected in accordance with the  
131 Human Tissue Act (2004). Each study was required to submit a research proposal to be approved  
132 by the executive committee before gaining access to the ALSPAC data. The overall aims of the  
133 study were included in this proposal.

134 For our analyses the sample was restricted to participants of European-descent who had  
135 polygenic score data (n=7,588 mothers). This sample size reduces for individual analyses due to  
136 missing data; the n for each analysis is reported in the measures description below and in the  
137 respective Tables/Figures. Similarly, not all genotyped mothers also had genotyped children;  
138 thus, for our analyses including children’s polygenic score, the sample size reduces to n= 4,996  
139 genotyped mother-child dyads.

140

#### 141 1.4. The UK Millennium Cohort Study (MCS)

142

143 The MCS is an ongoing UK longitudinal birth cohort study that was set up to follow the  
144 lives of children born at the turn of the new century<sup>8</sup>. Recruitment and retention over time is  
145 described in detail elsewhere.<sup>9</sup> Briefly, children born between September 2000 and January 2002  
146 across England, Scotland, Wales and Northern Ireland, alive and living in the UK at age 9  
147 months were eligible for inclusion. Eligible children were identified using government child  
148 benefit records, a benefit with almost universal coverage. The sample contained 18 552 families  
149 (18 827 children) at baseline. The first sweep of data was collected when cohort members were  
150 around 9 months old and subsequent sweeps of data were collected at ages 3, 5, 7, 11, 14 and 17  
151 years. At the age-14 assessment, saliva samples were collected for genotyping, from cohort  
152 members along with their biological mother and father if resident in the household and available.  
153 Parents provided written informed consent for all components of MCS. At the age 14 and 17  
154 follow-ups, children also provided informed consent. The study website contains details of all  
155 the data that are available (<https://cls.ucl.ac.uk/cls-studies/millennium-cohort-study/>).

156 For our analyses the sample was restricted to participants of European-descent who had  
157 polygenic score data (n=6,700 mothers and n=3,613 fathers). This sample size reduces for  
158 individual analyses due to missing data; the n for each analysis is reported in the measures’

159 description below and in the respective Tables/Figures. Similarly, not all genotyped  
160 mothers/fathers also had genotyped children; thus, for our analyses including children's  
161 polygenic score, the sample size reduces to n= 5,421 genotyped mother-child dyads, n=2,903  
162 genotyped father-child dyads and n=2,503 genotyped trios.

163

### 164 1.5. The Health and Retirement Study (HRS)

165

166 The HRS is a longitudinal survey of a representative sample of Americans aged >50 and  
167 their spouses, initiated in 1992 to study health and retirement among older people in the US.<sup>10</sup>  
168 HRS is administered biennially and includes over 26,000 persons in 17,000 households. During  
169 each wave of the survey, participants are asked about their economic well-being, health, social  
170 lives, and other factors relevant to aging and retirement  
171 (<http://hrsonline.isr.umich.edu/index.php>). The present study used data up to and including the  
172 2016 survey. HRS was approved by the University of Michigan institutional review board and  
173 informed consent was obtained from each respondent.

174 For our analyses the sample was restricted to participants of European-descent who had  
175 polygenic score data (n= 8,652; n=5,052 female, n=3,600 male). This sample size reduces for  
176 individual analyses due to missing data; the n for each analysis is reported in the measures'  
177 description below and in the respective Tables/Figures.

178

### 179 1.6. The Wisconsin Longitudinal Study (WLS)

180

181 The Wisconsin Longitudinal Study (WLS) is based on a 1/3 random sample of all  
182 Wisconsin high school graduates in 1957 ( $N = 10,317$ ) born between 1938 and 1940<sup>11</sup> and one of  
183 their randomly selected siblings ( $N=8,734$ ). Waves of data collection from graduates (i.e., the  
184 primary respondents) or parents of graduates were conducted in 1957, 1964, 1975, 1992, 2003,  
185 and 2011 and from a sibling in 1977, 1993, 2004, and 2011. Ethical approval for analysis of the  
186 WLS genetic data was provided by the University of Cincinnati's Institutional Review Board.

187 For our analyses the sample was restricted to participants of European-descent who had  
188 polygenic score data (n=8,479; n=4403 female; n=4076 male). This sample size reduces for  
189 individual analyses due to missing data; the n for each analysis is reported in the measures'  
190 description below and in the respective Tables/Figures.

191

192

## 193 **2. Genotyping**

194

### 195 2.1. The E-Risk cohort

196

197 Genotyping of E-Risk cohort members and their mothers was performed using Illumina  
198 HumanOmni Express 24 BeadChip arrays (Versions 1.1 and 1.2 respectively; Illumina,

199 Hayward, CA). We imputed additional SNPs using the IMPUTE2 software (Version 2.3.1,  
200 [https://mathgen.stats.ox.ac.uk/impute/impute\\_v2.html](https://mathgen.stats.ox.ac.uk/impute/impute_v2.html); Howie, Donnelly, & Marchini, 2009) and  
201 the 1000 Genomes Phase 3 reference panel<sup>13</sup>. Imputation was conducted on SNPs appearing in  
202 dbSNP (Version 140; <http://www.ncbi.nlm.nih.gov/SNP/>; Sherry et al., 2001) that were called in  
203 more than 98% of the samples. Invariant SNPs were excluded. The E-Risk cohort contains  
204 monozygotic twins, who are genetically identical; we therefore empirically measured genotypes  
205 of one randomly-selected twin per pair and assigned these data to their monozygotic co-twin.  
206 Prephasing and imputation were conducted using a 50-million-base-pair sliding window. The  
207 resulting genotype databases included genotyped SNPs and SNPs imputed with 90% probability  
208 of a specific genotype among European-descent members of the E-Risk cohort. We analysed  
209 SNPs in Hardy-Weinberg equilibrium ( $p > .01$ ).

210

## 211 2.2. The Dunedin cohort

212

213 Genotyping of Dunedin cohort participant-parents was performed using Illumina  
214 HumanOmni Express 12 BeadChip arrays (Version 1.1; Illumina, Hayward, CA). We imputed  
215 additional SNPs using the IMPUTE2 software (Version 2.3.1, Howie et al., 2009) and the 1000  
216 Genomes Phase 3 reference panel<sup>13</sup>. Imputation was conducted on SNPs appearing in dbSNP  
217 (Version 140; <http://www.ncbi.nlm.nih.gov/SNP/>; Sherry et al., 2001) that were called in more  
218 than 98% of the samples. Invariant SNPs were excluded. Prephasing and imputation were  
219 conducted using a 50-million base-pair sliding window. The resulting genotype databases  
220 included genotyped SNPs and SNPs imputed with 90% probability of a specific genotype among  
221 European-descent members of the Dunedin cohort. We analysed SNPs in Hardy-Weinberg  
222 equilibrium ( $p > .01$ ).

223

## 224 2.3. The ALSPAC cohort

225

226 Genotyping of ALSPAC cohort members was performed using the Illumina  
227 HumanHap550 quad chip genotyping platforms by 23andme subcontracting the Wellcome Trust  
228 Sanger Institute, Cambridge, UK and the Laboratory Corporation of America, Burlington, NC,  
229 US. ALSPAC mothers were genotyped using Illumina human660w quad array at the Centre  
230 National de Genotypage (CNG) and genotypes were called with Illumina GenomeStudio. Quality  
231 control filtering was done using the PLINK (v1.07) software. SNPs with a minor allele frequency  
232 of  $< 1\%$ , call rate  $< 95\%$  and Hardy-Weinberg equilibrium (HWE)  $P < 5E-7$  were removed. Both  
233 offspring and maternal genotype data have been jointly imputed to the 1000 genomes reference  
234 panel (version 1, Phase 3, Dec 2013 Release). All individuals with non-European ancestry were  
235 removed.

236

## 237 2.4. The MCS cohort

238

239 Genotyping of MCS cohort members and their biological parents was performed using  
240 Illumina Infinium global screening arrays-24 v1.0 in the Illumina Array Facility, University of  
241 Bristol. Genotypes were called with Illumina Genome Studio v2.0.4. Quality control was done  
242 using QCtools\_v2.0.1 (<https://www.well.ox.ac.uk/~gav/qctool/>) and PLINK, using standard  
243 procedures described in detail elsewhere<sup>15</sup>. SNPs with a minor allele frequency of < 1%, call  
244 rate < 95% and Hardy-Weinberg equilibrium  $P < 2.5E-8$  were removed. Imputation was done  
245 using the Michigan Imputation Server (MIS; [imputationserver.sph.umich.edu](http://imputationserver.sph.umich.edu)). Prepared data  
246 was submitted to the MIS, phased with Eagle.v2.4 (Loh et al., 2016) and imputed to Haplotype  
247 Reference Consortium release 1.1 (HRC r1.1; <http://www.haplotypereference-consortium.org>)  
248 (McCarthy et al., 2016).

## 249 2.5. The HRS cohort

251  
252 Genotyping of HRS cohort members was performed using the Illumina HumanOmni2.5  
253 BeadChips (HumanOmni2.5-4v1, HumanOmni2.5-8v1), at the Center for Inherited Disease  
254 Research (CIDR) at Johns Hopkins University. Individuals with missing call rates >2%, SNPs  
255 with call rates < 0.0001, chromosomal anomalies, and first degree relatives in the HRS were  
256 removed. Imputation was performed by the University of Washington Genetics Analysis Center  
257 (GAC) to the 1000 Genomes Project cosmopolitan reference panel phase 3 version 5 (initial  
258 release on May 2013, haplotypes released Oct 2014), using IMPUTE2.<sup>12</sup>

## 259 260 261 2.6. The WLS cohort

262  
263 Genotyping of WLS cohort members was performed using the Illumina  
264 HumanOmniExpress array, at the Center for Inherited Disease Research (CIDR) at Johns  
265 Hopkins University and using the calling algorithm GenomeStudio version 2011.1, Genotyping  
266 Module version 1.9.4, GenTrain Version 1.0. Imputation was performed by the University of  
267 Washington Genetics Analysis Center (GAC), after quality control using the GAC's standardized  
268 QC procedures,<sup>16</sup> against the Haplotype Reference Consortium (HRC) v1.1 European reference  
269 panel<sup>17</sup> using IMPUTE2.<sup>12</sup>

270  
271  
272



273 **3. Polygenic scoring**

274

275 We computed polygenic scores based on the most recent Social Science Genetic  
276 Association Consortium (SSGAC) GWAS of educational attainment<sup>18</sup>  
277 (<https://www.thessgac.org/data>). In the E-Risk, Dunedin, ALSPAC and MCS cohorts, polygenic  
278 scores were calculated following the method described by Dudbridge<sup>19</sup> using the PRsice software  
279 [v1.22, <http://prsice.info/>; Euesden, Lewis, & O'Reilly, 2015)]. Briefly, SNPs reported in the  
280 GWAS<sup>18</sup> were matched with SNPs in each cohort, regardless of nominal significance for their  
281 association with educational attainment. We performed clumping by retaining the SNP with the  
282 smallest p value from each linkage disequilibrium block (excluding SNPs with  $r^2 > .1$  in 500-kb  
283 windows), then weighted SNPs by effect estimate, and then summed weighted counts across all  
284 genotypes to calculate each participant's polygenic score.

285 In the HRS and WLS cohorts polygenic scores were computed by the SSGAC using the  
286 LD Pred software.<sup>21</sup> Because HRS and WLS data were included in the GWAS of educational  
287 attainment, polygenic scores for these datasets were constructed using summary statistics after  
288 the target dataset was excluded. In the current analysis, we rely on the polygenic score  
289 constructed using the multi-trait analysis of genome-wide summary statistics (MTAG; Turley et  
290 al., 2018) because it has been shown to improve the predictive power of polygenic scores.

291 Polygenic scoring in each cohort was restricted to individuals of European-ancestry. To  
292 account for potential population stratification, polygenic scores were residualised on the first ten  
293 principal components computed from the genome-wide data in each cohort.<sup>23</sup> Residualised  
294 polygenic scores were normally distributed and standardized to  $M=0$ ,  $SD=1$  in each cohort.

295

296 **4. Description of measures**

297

298 4.1. Prenatal period

299

300 *Cigarette smoking.* In E-Risk, mothers' smoking was assessed retrospectively, 1 year  
301 after birth, by asking whether mothers had smoked any cigarettes during the pregnancy (27.3%,  
302 total n=846). In ALSPAC, mothers' smoking was assessed prospectively, at 18 and 32 weeks of  
303 gestation, by asking whether mothers had smoked in the last two weeks (at 18 weeks gestation)  
304 or were currently smoking (at 32 weeks gestation). We combined data from both time points,  
305 replacing missing data at one time point with valid data from the other if available, to construct a  
306 measure of whether mothers reported smoking during pregnancy (19.7%; total n=7,190). In  
307 MCS, mothers' smoking was assessed retrospectively, at 9 months, by asking mothers about  
308 their history of smoking and about changes in smoking during pregnancy. We combined these  
309 questions following previous publications<sup>24</sup> to create a measure of whether mothers had reported  
310 smoking during pregnancy (21.0%, total n=6,690).

311

312 *Heavy alcohol drinking.* In ALSPAC, mothers' heavy drinking was assessed  
313 prospectively, at 18 and 32 weeks of gestation, by asking mothers how many days in the past  
314 month they had been drinking the equivalent of 4 units of alcohol (e.g. 2 pints of beer, 4 glasses  
315 of wine or 4 pub measures of spirit). We combined the response options ranging from  
316 "everyday" to "1-2 days" versus the response option "None". We combined data from both time  
317 points, replacing missing data at one time point with valid data from the other if available, to  
318 classify women as heavy drinkers (21.9%, total n=7,144). In MCS, mothers' heavy drinking was  
319 assessed retrospectively, at 9 months, by asking mothers whether they drank alcohol during  
320 pregnancy. Mothers who reported drinking regularly (between daily and once or twice a week  
321 when pregnant) were asked how many units of alcohol they drank per week on average. We  
322 divided the reported units of drinking by the reported weekly frequency of drinking to obtain an  
323 approximate measure of units consumed on days they drank (e.g., if a mother reported drinking  
324 every day, and reported drinking 20 units per week on average, it would be  $20/7=2.86$  units per  
325 day). Mothers who reported drinking rarely (1-2 times per month to less than once per month)  
326 were asked how many units of alcohol they drank on days they drank. We combined these two  
327 measures and categorized everyone who reported drinking 4 or more units on days they drank as  
328 heavy drinkers (2.7%, total n= 6,695).

#### 329 330 4.2. Infancy

331  
332 *Breastfeeding.* In E-Risk, breastfeeding was assessed when the children were 2 years old  
333 by asking whether mothers had ever breastfed (48.1%; total n=855; note that E-Risk is a twin  
334 sample, so breastfeeding rates would be expected to be lower than in singletons). In ALSPAC,  
335 breastfeeding was assessed when children were 4 weeks, 6 months and 15 months old, by asking  
336 mothers about their breastfeeding. We constructed a summary measure, replacing missing data at  
337 one time point with valid data from the other if available, indicating whether mothers had  
338 reported ever breastfeeding (75.6%; n=total n=7,025). In MCS, breastfeeding was assessed when  
339 the children were 9 months old by asking whether mothers had ever breastfed (73%, total n=  
340 6,222).

#### 341 342 4.3. Childhood

343  
344 *Cognitive stimulation.* In E-Risk, cognitive stimulation was measured when children were aged  
345 5, 7, 10, and 12 years, as previously described.<sup>25</sup> Briefly, at age 5, mothers responded to 12 items  
346 asking about activities with their twins (example items: "Have you and the twins visited a  
347 museum?"). The internal consistency reliability was  $\alpha = .59$ . At ages 7, 10 and 12, study  
348 interviewers provided observations of each family's home using six items adapted from the  
349 Home Observation for Measurement of the Environment (HOME; Bradley, Caldwell, Rock,  
350 Hamrick, & Harris, 1988; Caldwell & Bradley, 1984) (example item: "Do the children have  
351 books?"). Internal consistency reliabilities ranged from  $\alpha = .70$  to  $\alpha = .81$  across ages (mean  $\alpha =$

352 .75) Measures were standardized within age, then averaged across age (total n=879). In Dunedin,  
353 cognitive stimulation was assessed using video-observations and home-observations as  
354 previously described<sup>5,28</sup>. Briefly, during the home visit, each parent– child dyad was videotaped  
355 in three, increasingly demanding, semi-structured situations, each lasting 10 min. Each situation  
356 was rated by trained coders using a set of 7-point scales developed for the NICHD Study of  
357 Early Child Care (NICHD Early Child Care Research Network, 1999). Interrater agreement  
358 ranged from .77 to .96. Following the home visit, interviewers rated each family on the HOME<sup>27</sup>  
359 including on items capturing the availability of learning materials and attempts by parents to  
360 teach skills (example item: “Child has three or more books of his or her own”). To construct a  
361 summary variable of cognitive stimulation that combines video-and home observations we  
362 standardized each measure and averaged them (total n=643). In ALSPAC, cognitive stimulation  
363 was assessed using three items that mothers were asked repeatedly (seven times each) between  
364 child age 6 months and 7 years: how often the child was taken out to the library, how often the  
365 mother read to the child, and the number of books the children owned. We constructed cross-age  
366 measures for each question, by standardizing within age and averaging across age (i.e. average  
367 visits to library across ages; average reading to the child across ages; average number of books  
368 owned by child across ages). We then standardized each cross-age measure and averaged them to  
369 create an overall summary variable of cognitive stimulation (total n=6,180). In MCS, cognitive  
370 stimulation was assessed at ages 5 and 7. At both ages, parents were asked about their reading  
371 with the child (“How often do you read to <child>”) and visits to the library (“Over the past 12  
372 months, how often has <child> been to the library?”). We constructed cross-age measures for  
373 each question by averaging across age. We standardized each cross-age measure and averaged  
374 them to create an overall summary variable of cognitive stimulation (total n=6,077).

375  
376 *Warm, sensitive parenting.* In E-Risk, warm, sensitive parenting was assessed when children  
377 were aged 5, 7, and 10 years as previously described.<sup>25</sup> Briefly, at ages 5 and 10, maternal  
378 warmth and dissatisfaction were each assessed using a 5 min speech sample from mothers.<sup>30,31</sup>  
379 Interrater agreement was  $r=.90$  for maternal warmth and  $r=.84$  for dissatisfaction. At ages 7 and  
380 10, positive and negative parenting was assessed through study interviewer observations of  
381 parent–child interactions during the study visit using items adapted from the HOME<sup>26,27</sup> and the  
382 Dyadic Parent–Child Interactive Coding System–Revised<sup>32,33</sup> (example items: “Is the parent  
383 affectionate to the child?”; “Is the parenting of the child overly strict?”). Internal consistency  
384 reliabilities ranged from  $\alpha = .72$  to  $\alpha = .82$  (mean  $\alpha = .82$  for positive parenting, and  $\alpha = .75$  for  
385 negative parenting). Measures were standardized and averaged within age, then re-standardized  
386 and averaged across age (n=880). In Dunedin, warm, sensitive parenting was assessed as  
387 previously described,<sup>5,28</sup> using video-observations and home-observations as described for the  
388 measure of cognitive stimulation. Warm, sensitive parenting reflects parental expressions of  
389 warmth, affection and sensitivity toward their child (example items: “Parent’s voice conveys  
390 positive feelings towards child”; “Parent does not express overt annoyance with or hostility to  
391 child”). We standardized each measure and averaged them to construct a summary variable of

392 cognitive stimulation that combines video-and home observations (n=640). In ALSPAC, warm,  
393 sensitive parenting was assessed when children were 4, 7 and 10 years old, as previously  
394 described<sup>34</sup>. Briefly, at ages 4 and 7 mothers responded to 8 statements capturing positivity  
395 about the child (example item: “I really love this child”) and negativity (“I often get very irritated  
396 with this child”). Because the scores for positivity are heavily skewed, previous publications  
397 have used only the negativity scales;<sup>34</sup> we followed this same approach. Internal consistency  
398 reliabilities were  $\alpha=.63$  at age 4 and  $\alpha=.71$  at age 7. At age 10, children responded to 8 questions  
399 about their relationship with their parents (example item: “My parents like me”). Because of the  
400 highly skewed distributions of these items, we recoded them into binary items, combining  
401 response options 1 (not true); 2 (mostly untrue) and 3 (partly true) versus 4 (mostly true) and 5  
402 (true). We then averaged across items to create a summary score. Internal-consistency reliability  
403 was  $\alpha=.71$ . We standardized each of these measures within age and then averaged across ages to  
404 construct a cross-age summary measure of warmth and sensitivity (n=6,324). In MCS, warm,  
405 sensitive parenting was assessed at ages 3, 7 and 11. At age 3, study interviewers rated parent–  
406 child interactions during the study visit using binary items adapted from the HOME<sup>26,27</sup> (example  
407 items: “Mother's voice is positive when speaking to <child>”). We averaged across items.  
408 Because the resulting measure was so skewed in this sample, we recoded it to be binary, so that  
409 participants who had scored positively in each item received a 1, and participants who had scored  
410 anything less received a 0. At age 3, parents also responded to 15 items from the Child-Parent  
411 Relationship Scale (CPRS; Driscoll & Pianta, 2011; example items: “I share an affectionate,  
412 warm relationship with <child>”; “<Child> and I always seem to be struggling with each other”).  
413 Previous analyses by the MCS team<sup>35</sup> report internal consistency reliabilities of  $\alpha=.83$  for the  
414 conflict subscale and  $\alpha=.72$  for the closeness subscale. We used a previously-constructed  
415 measure, supplied by MCS, for our analyses. We constructed an age-3 summary measure by  
416 standardizing the HOME and CPRS measures and averaging across measures. At age 7 and 11,  
417 parents responded to 5 items (at age 7) and 2 items (age 11) asking about the relationship with  
418 their child (example item: “I have frequent battles of will with <child>”). At each age, we  
419 averaged across items to create summary measures. We then standardized each measure within  
420 age and averaged across ages to construct an overall summary measure (total n= 6,553).

421  
422 *Household chaos.* In E-Risk, household chaos was assessed when children were aged 7,  
423 10, and 12 years as previously described<sup>25</sup>. Briefly, at ages 7, 10, and 12, household chaos was  
424 assessed through study interviewers’ observations of family’s homes using three items adapted  
425 from the HOME (Bradley et al., 1988; Caldwell & Bradley, 1984; example item: “Is the house  
426 chaotic or overly noisy?”). Internal consistency reliabilities ranged from  $\alpha = .53$  to  $\alpha = .58$  across  
427 ages (mean  $\alpha = .56$ ). At age 12, household chaos was assessed through reports from mothers and  
428 children using 12 items adapted from the Confusion, Hubbub, and Order Scale (CHAOS;  
429 Matheny, Wachs, Ludwig, & Phillips, 1995), the Family Routines Inventory<sup>37</sup> and the Family  
430 Ritual Questionnaire<sup>38</sup> following previous research (Evans, Gonnella, Marcynyszyn, Gentile, &  
431 Salpekar, 2005; example items: “You can hardly hear yourself think in our home”; “We are

432 always losing things at home”). Internal consistency reliabilities were  $\alpha = .76$  for mother’s report  
433 and  $\alpha = .78$  for children’s report. Measures were standardized and averaged within age, then re-  
434 standardized and averaged across age (n=878). In ALSPAC, household chaos was assessed  
435 between 18 months and 10 years using items that asked about routines, noise and crowding in the  
436 home. At 18 months, 2.5 years, 5 years, 6 years, 7 and 9 years mothers responded to 1 item about  
437 whether their child had a regular sleep routine. We constructed a summary measure by averaging  
438 across ages. At 10 years, mothers responded to three questions asking about the noise level in  
439 their home (example item: “It is often so noisy at home it is difficult to hold a conversation”). At  
440 age 2 and 2.5 years, we used a previously-constructed household crowding that was based on  
441 maternal reports of the number of persons living in the home<sup>40</sup>. To construct a summary  
442 measure, we standardized each individual measure, then averaged across measures (n=6,210). In  
443 MCS, household chaos was assessed when children were 3, 5, 7 and 11 years old. At each age,  
444 mothers responded to 1-2 items about whether children had set routines (example item: “Child  
445 has regular bedtimes”). We constructed a summary measure by averaging across ages. At age 3  
446 and 11, mothers additionally responded to items about the atmosphere at home (example item:  
447 “You can hardly hear yourself think in our home”). We constructed a summary measure by  
448 averaging across ages. We then standardized these individual measure and averaged across  
449 measures to construct an overall summary measure (total n=6,615).

450  
451 *Health-parenting (parents’ promotion of a healthy lifestyle for their children).* In E-Risk,  
452 health-parenting was assessed at the age-10 home visit as previously described,<sup>41</sup> using mother’s  
453 responses to items about children’s health-related behaviours, including questions about how  
454 much time children spent watching TV; their diet; and their tooth-brushing (example items:  
455 “How many hours of television do the twins watch on an average day?”). We averaged across  
456 items to create a summary measure (n=877). In ALSPAC, health-parenting was assessed  
457 between 15 months and 13 years, using three sets of items that were repeatedly asked across ages  
458 (six times each), asking about how much time children spent watching TV; their diet; and their  
459 tooth-brushing. For TV watching, mothers responded to a question about how many hours their  
460 child spent watching TV on weekdays and weekends; we combined answers to both questions.  
461 For tooth brushing, mothers responded to a question about the frequency that their child brushed  
462 teeth; we categorized responses into “once or less than once per day” and “more than once per  
463 day”. For diet, mothers responded to questions about how often their child ate a range of foods.  
464 These variables have previously been factor-analysed to derive dietary patterns, including  
465 ‘processed’ and ‘health conscious’ diets.<sup>42</sup> To construct a summary measure of health-parenting,  
466 we averaged each set of items (i.e. TV watching; tooth brushing; processed diet; health-  
467 conscious diet) across ages, standardized the cross-age measures, and then averaged across these  
468 measures (n=5,649). In MCS, health-parenting was assessed at ages 3, 5, 7 and 11. At each age,  
469 mothers responded to an item asking how many hours children spent watching TV per day. We  
470 averaged these items across ages. At ages 5, 7 and 11, mothers additionally responded to items  
471 asking about children’s diet, such as how many portions of fruit the child ate per day. We

472 averaged these items across ages. We then standardized these individual measures and averaged  
473 across measures to construct an overall summary measure (n=6,437).

474

475 *School support.* In ALSPAC, parents' school support (engagement with schooling and  
476 ambitions for children's education) was assessed between child ages 7 and 12 years, using  
477 mother and teacher reports. Mothers were asked at three ages (7, 10 and 11 years) about their  
478 help with schoolwork (variations of the item "Mum helps child prepare for school"). Mothers  
479 were also asked (at 10, 11, and 12 years) about their hopes for their child's schooling (variations  
480 of the item "What sort of education do you hope your child will have?" with response options  
481 ranging from "the minimum – and leave school as soon as possible" to "to go to University").  
482 Teachers were asked at two ages (7-8 years and 10-11 years) how supportive the teacher thought  
483 the parents are towards the child's learning and how involved the parents were in the child's  
484 schooling (example items: "Child's parents have attended teacher parent session"; "Childs  
485 parents have been involved in other school activities"). We constructed cross-age measures by  
486 averaging across ages, then standardized each measure and averaging across measures to create  
487 an overall summary measure (n= 6,603). In MCS, parents' school support was assessed at ages 7  
488 and 11, using mother, child and teacher reports. At both ages, mothers responded to questions  
489 about their hopes for their child's schooling (example item: "What would you like <child> to do  
490 at the age of 16?"). At both ages, mothers were also asked about their involvement with  
491 schooling (example item: "During this school year has anyone at home been to a parents' evening  
492 or similar event at school?"). At age 11, mothers were asked about their help with schoolwork  
493 (example item: "How often does anyone at home make sure [child's] homework is complete?").  
494 At age 11, teachers and children were asked how interested parents were in children's education  
495 (example item: "How often do your parents take an interest in your school work?"). We  
496 constructed cross-age measures by averaging across ages, then standardized each measure and  
497 averaging across measures to create an overall summary measure (n= 6,587).

498

#### 499 4.4. Adolescence

500

501 *Parental monitoring (rule-setting and knowledge of children's activities and*  
502 *whereabouts).* In E-Risk, parental monitoring was assessed at age 12 as previously described.<sup>43</sup>  
503 Briefly, at age 12 mothers and children each responded to ten items adapted from the Monitoring  
504 and Supervision Questionnaire<sup>44</sup> (example items "Do you know where <name> goes during  
505 his/her free time?"; "Does <name> need to have your permission to leave home (or go  
506 somewhere with friends)?"). Internal consistency reliabilities were  $\alpha = .66$  for mothers' reports  
507 and  $\alpha = .71$  for children's reports. We constructed a summary measure by standardizing within  
508 informant and averaging across informants (n=866). In ALSPAC, parental monitoring was  
509 measured at child ages 13 and 14 (children's reports) and at child age 17 (mothers' reports). At  
510 child ages 13 and 14 parental monitoring was assessed using a computer-assisted survey  
511 completed by the young person when they attended a research clinic. Young people responded to

512 24 items (at age 13) and 10 items (at age 14) asking about parents' knowledge and monitoring<sup>44</sup>  
513 (example item: "How often do your carers / parents know what you do during your free time?";  
514 "How often do you have to have your carers / parents' permission before you go out on  
515 weeknights?"). Internal-consistency reliability was  $\alpha = .89$  at age 13 and  $\alpha = .84$  at age 14. We  
516 averaged across items at each age. At age 17, mothers responded to 10 items asking about  
517 parental knowledge and monitoring<sup>44</sup> (example item: "When <child> went out during the last  
518 year, how often did you know what child was doing in their spare time?"; "During the past year,  
519 how often have you started a conversation with <child> about what they were doing in their  
520 spare time?"). Internal-consistency reliability was  $\alpha=.80$ . We averaged across items. To construct  
521 a summary measure of parental monitoring across ages, we standardized each measure within  
522 age and then averaged across ages (n=4,092). In MCS, parental monitoring was assessed at 14.  
523 At age 14, adolescents and mothers each responded to 3 questions about parental knowledge of  
524 adolescents' activities and whereabouts (example item: "When child goes out how often do you  
525 know where they are going?"). Internal consistency reliabilities were  $\alpha=.76$  for mothers' reports,  
526 and  $\alpha=.81$  for children's reports. To construct a summary measure of parental monitoring, we  
527 standardized each measure within informant and averaged across informants (total n=6,625).

528

#### 529 4.5. Adulthood

530

531 *Financial help provided to offspring.* In HRS, financial help provided to offspring was  
532 assessed by asking participants if they had given financial help totaling \$500 or more to any of  
533 their children or grandchildren since last interview (1: Yes; 0: No) (n=8,403). In WLS, financial  
534 help was assessed by asking participants if they or their spouse had given anyone a total of  
535 \$1,000 or more in money, property or other assets (including money for a down payment on a  
536 home, living expenses, to pay for education, medical care, or for other needs) since the last  
537 interview (1: Yes; 0: No). Anyone who responded yes was asked a follow-up question, about  
538 whether these gifts were given to respondents' children. All respondents who responded yes to  
539 both questions received a 1 and 0 otherwise (n=8,082).

540

541 *Support with childcare.* In HRS, support with childcare was assessed by asking  
542 participants whether they had spent 100 hours or more taking care of grandchildren or great  
543 grandchildren since the last interview (n=7,451). In WLS, support with childcare was assessed  
544 by asking participants a series of four questions that began, "During the past month, did you help  
545 your sons or daughters who are 19 or older with...". These questions concluded with different  
546 types of support respondents might provide for their children, including "babysitting or  
547 childcare". We coded everyone who responded 'yes' to babysitting or childcare as 1 and 0  
548 otherwise (n=5,624).

549

550 *Leaving an inheritance.* In HRS, the probability of leaving an inheritance was assessed  
551 by asking HRS participants about the chance that they would leave an inheritance totaling

552 \$10,000 or more, with response options ranging from 0 (Absolutely no chance) to 100  
553 (Absolutely certain) (n=8,626). In WLS, the intention of leaving an inheritance was assessed by  
554 asking participants about who would get their assets, including home, savings, life insurance and  
555 the like, if they were to die tomorrow, and then (if respondents reported having a spouse), who  
556 would get their assets if they outlived their spouse. Responses were open-ended, thus allowing  
557 respondents to designate anyone of any relation. We coded responses that included biological  
558 sons or daughters as 1 and 0 otherwise. Many respondents (i.e., 41% in 2003-07 and 59% in  
559 2011) replied with “spouse” to the first question, thus we relied on responses from the second  
560 question. For respondents who reported not currently having a spouse, responses from the first  
561 question were used. Thus, the interpretation of this variable is that it indicates the intention of  
562 leaving an inheritance to *only* one’s children (i.e., as opposed to every other reported  
563 combination of relations). Responses from both groups were combined, producing a single  
564 dichotomous item (n=7,217).

## 565 566 **5. Statistical analyses**

567  
568 To analyse binary outcomes, we used Poisson regressions and report relative risks. To  
569 present these analyses visually, we used marginsplots as implemented in Stata. Each margins  
570 plot reports the predicted probabilities of the outcome at each level of the polygenic score. To  
571 analyse continuous outcomes, we used linear regressions and report standardized regression  
572 coefficients. To present these analyses visually, we used forest plots. Each forest plot reports a  
573 meta-analysed estimate across cohorts, as obtained using a random-effects model. All  
574 significance tests were two-tailed. Analyses of the ALSPAC, E-Risk, Dunedin, and MCS cohorts  
575 were conducted using Stata version 17.0,<sup>45</sup> as well as Mplus version 8.2 for E-Risk;<sup>46</sup> analyses of  
576 WLS and HRS were conducted using R. Because E-Risk is a twin sample, we used structural  
577 equation models for dyads with indistinguishable members to take into account the unique  
578 structure of the data.<sup>47</sup> Because the MCS cohort has a complex stratified and clustered design and  
579 non-random dropout over the years, we used sampling weights that correct for design and  
580 nonresponse, as well as adjustment for clustering, following instructions published by the MCS  
581 Research Team.<sup>48</sup> Following these instructions, when analysing longitudinal data, we used the  
582 weight for the last time point that was included in the construction of the outcome variable (e.g.  
583 if data up to age 14 was included, we used the weight provided for age 14).

584 In models predicting childhood and adolescent parenting, we adjusted for child sex. In  
585 models predicting parental investment to adult children, we also adjusted for parents’ age, net  
586 worth (in WLS) or assets (in HRS), number of children, labour force status, and, for analyses  
587 predicting help with childcare, physical proximity to offspring.

588 We dealt with missing data in the construction of measures using a “60%” rule:  
589 participants needed to have valid data in at least 60% of time points across age, in order to be  
590 included in a measure. For example, for constructing a cross-age measure of “visits to the  
591 library” across 7 time points in ALSPAC, those with 3 or less missing data points were included.  
592 For aggregating these individual measures, all available data were used. For example, for



593 constructing an aggregate measure of cognitive stimulation in ALSPAC, made up of cross-age  
594 measures for visits to the library, reading with the child, and books the child owned, we included  
595 participants with valid data in at least one of these three cross-age measures (participants with  
596 missing data in all three measures were excluded).

597 We dealt with missing data in our analyses by including participants who had valid data  
598 on all measures (constructed as described above). In ALSPAC, E-Risk, Dunedin and MCS we  
599 conducted sensitivity analyses using Full Information Maximum Likelihood (FIML) estimation  
600 as implemented in Stata; this did not change the results. The exact n for each measure is reported  
601 in the measures' description.

602 The premise and analysis plan for this project were pre-registered at  
603 [https://sites.duke.edu/moffittcaspi/projects/files/2021/07/Wertz\\_2019a.pdf](https://sites.duke.edu/moffittcaspi/projects/files/2021/07/Wertz_2019a.pdf). All analyses reported  
604 here were checked for reproducibility by an independent data-analyst, who recreated the code by  
605 working from the manuscript and applied it to a fresh dataset.

606  
607

608 **SUPPLEMENTARY FIGURES**

609

610 **Supplementary Figure 1.** Associations between maternal and child polygenic scores and  
 611 childhood parenting in the ALSPAC, E-Risk and MCS cohorts.

612

613

614

615

616

617

618

619

620

621

622

623

624

625

626

627

628

629

630

631

632

633

634

635

636

637

638

639

640

641

642

643

644

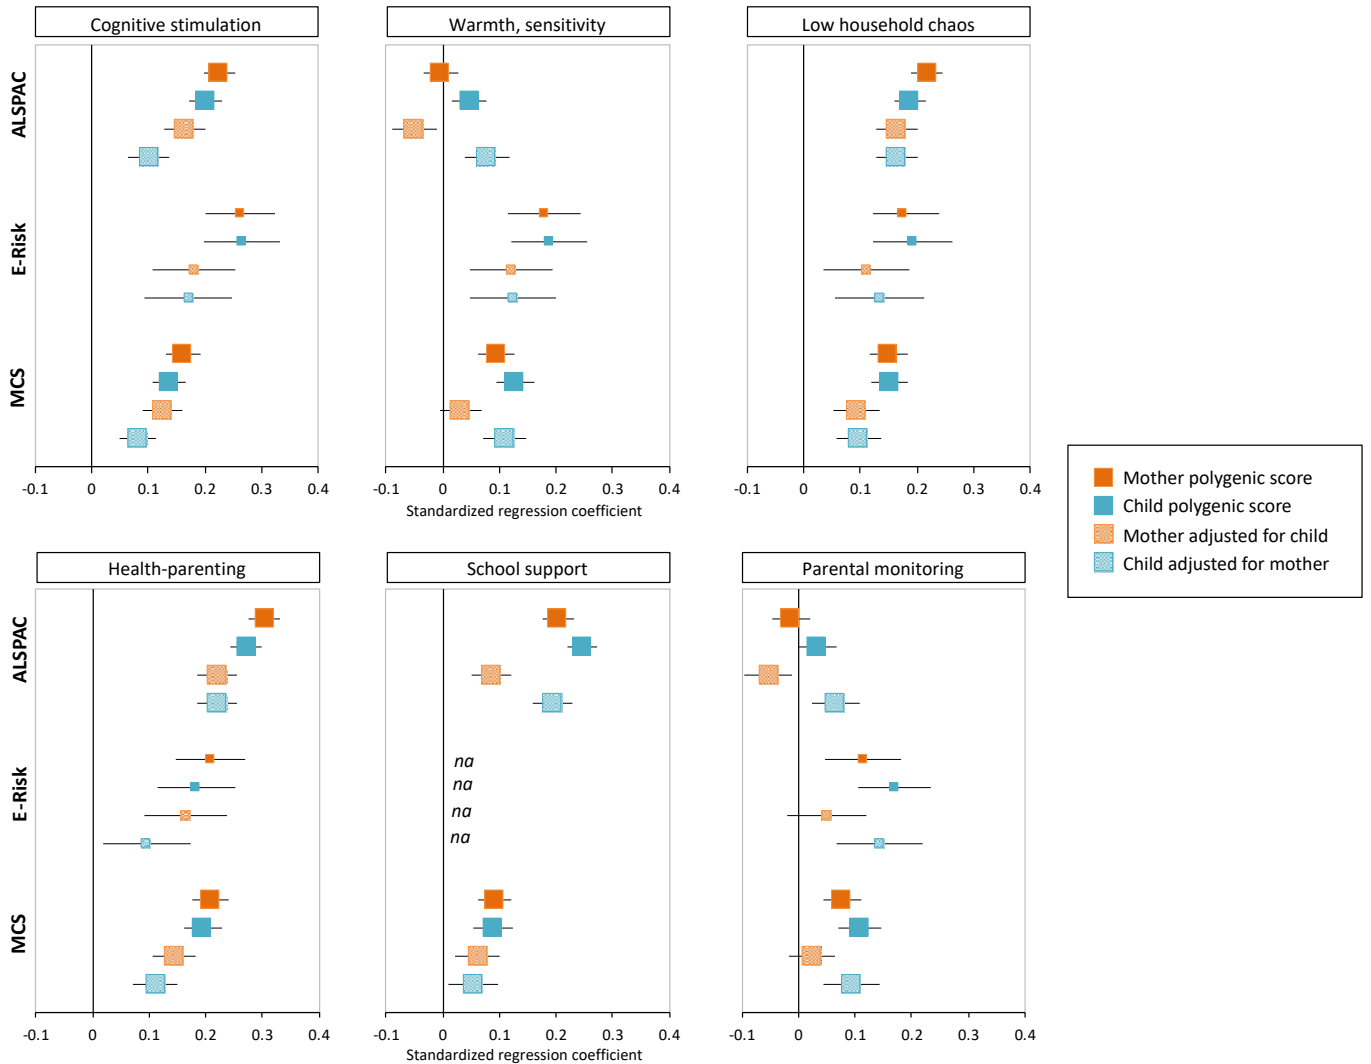

645

646

647

648

649

650

651

652

653

*Note:* The Figure shows associations (expressed as standardized regression coefficients) between maternal and child education polygenic scores and measures of parenting during childhood (cognitive stimulation; warmth, sensitivity; low household chaos; health-parenting; school support) and adolescence (parental monitoring) in the ALSPAC, E-Risk, and MCS cohorts (the Dunedin cohort is not included because it does not contain measures of child genetics). Orange boxes indicate mother polygenic scores, before (darker orange) and after (patterned orange) adjusting for child polygenic score. Blue boxes indicate child polygenic scores, before (darker blue) and after (patterned blue) adjusting for mother polygenic score. Not all measures were available in each cohort (e.g. measures of school support were only available in the ALSPAC

654 and MCS cohorts). The centre of the effect marker indicates the estimate of the association  
655 between polygenic score and parenting, expressed as a standardized regression coefficient. The  
656 error bars indicate 95% confidence intervals. The size of the effect size markers corresponds to  
657 the sample size, so that larger sample sizes have larger markers. The number of participants  
658 (mother-child dyads) included in the analysis were as follows: for cognitive simulation ALSPAC  
659 n=4,342; E-Risk n=859; MCS n=5,093; for warmth, sensitivity ALSPAC n=3,926; E-Risk  
660 n=860; MCS n=5,225; for low household chaos ALSPAC n=4,451; E-Risk n=858; MCS  
661 n=5,117; for health-parenting ALSPAC n=4,093; E-Risk n=858; MCS n=5,124; for school  
662 support ALSPAC n=4,586; MCS n=5,228; for parental monitoring ALSPAC n=3,343; E-Risk  
663 n=847; MCS n=5,414. ALSPAC=Avon Longitudinal Study of Parents and Children; E-  
664 Risk=Environmental Risk Longitudinal Twin Study; MCS=Millennium Cohort Study.  
665

666 **Supplementary Figure 2.** Associations between mothers', father's and child polygenic scores in  
 667 the MCS cohort.  
 668

**Cognitive stimulation**

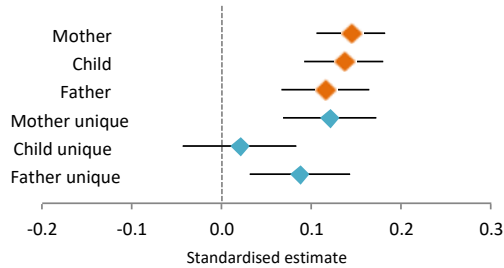

**Warm, sensitive parenting**

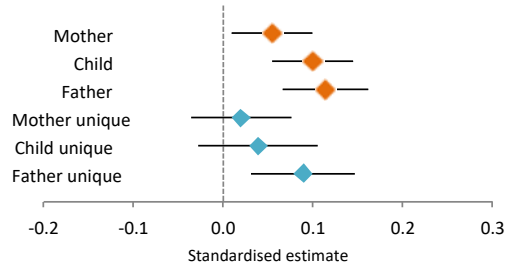

**Low household chaos**

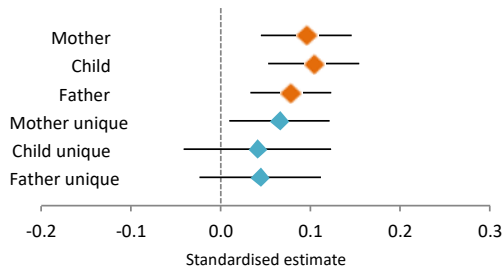

**Health-parenting**

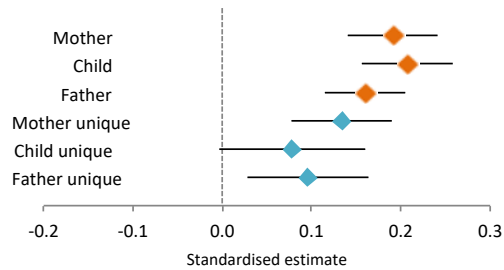

**School support**

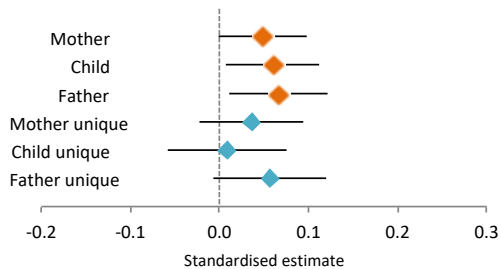

**Parental monitoring**

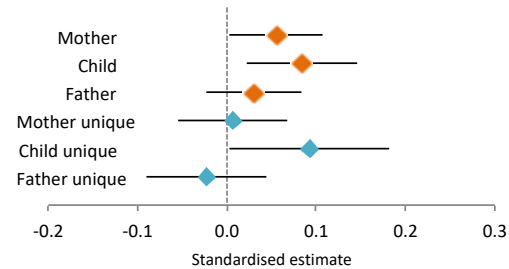

669

670

671 *Note:* The figure shows standardised estimates of associations between mother, father and child  
 672 education polygenic scores and parenting, during childhood and adolescence, both for mother,  
 673 father and child polygenic scores individually (in orange) as well as the unique association for  
 674 each score when in a model containing adjusting for the others (in blue). The centre of the effect  
 675 marker indicates the estimate of the association between polygenic score and parenting,  
 676 expressed as a standardized regression coefficient. The error bars indicate 95% confidence  
 677 intervals. All analyses were done in the subset of MCS participants who had genetic data and  
 678 parenting data (n=2,503; with slightly lower n's across parenting measures).  
 679

680 **SUPPLEMENTARY TABLES**

681

682 **Supplementary Table 1.** Evidence from previous research for associations between parental investment and child outcomes and for  
 683 associations between children’s genes and child outcomes.

684

| <b>Evidence for associations between parental investment and child outcomes</b> |                                                                                                                                                                                                                                                                                                                                                                                                                                                                                                                                                                                                                                                                                                                                                                                                                                                                                                                                                                                                                                                                                                                             |
|---------------------------------------------------------------------------------|-----------------------------------------------------------------------------------------------------------------------------------------------------------------------------------------------------------------------------------------------------------------------------------------------------------------------------------------------------------------------------------------------------------------------------------------------------------------------------------------------------------------------------------------------------------------------------------------------------------------------------------------------------------------------------------------------------------------------------------------------------------------------------------------------------------------------------------------------------------------------------------------------------------------------------------------------------------------------------------------------------------------------------------------------------------------------------------------------------------------------------|
| <b>Developmental period</b>                                                     | <b>Description of evidence</b>                                                                                                                                                                                                                                                                                                                                                                                                                                                                                                                                                                                                                                                                                                                                                                                                                                                                                                                                                                                                                                                                                              |
| Prenatal period                                                                 | Many observational studies report associations between prenatal smoking and heavy drinking and various child outcomes, including physical health outcomes (such as birth weight, BMI, asthma), <sup>49–51</sup> behaviour <sup>52</sup> and cognition. <sup>53</sup> Although most of these studies control for confounders, they may still suffer from residual confounding, including from genetic influences. Evidence from RCTs or natural experiments, including genetically-sensitive designs, suggests effects of prenatal smoking predominantly on birth weight. <sup>54–56</sup> Likewise, most of the evidence for links between prenatal heavy drinking and many adverse child outcomes comes from observational studies, <sup>57,58</sup> evidence from quasi-experimental studies suggests a potential causal role of prenatal alcohol exposure on cognitive outcomes, and weaker evidence for a role in low birthweight. <sup>59</sup>                                                                                                                                                                        |
| Infancy                                                                         | As with prenatal smoking and heavy drinking, most of the evidence linking breastfeeding to child outcomes comes from observational studies. These studies show associations with many child outcomes, particularly childhood physical health outcomes such as obesity <sup>60</sup> and asthma, <sup>61</sup> and with child cognitive outcomes. <sup>62</sup> As with prenatal smoking and heavy drinking, a threat to the interpretation of these results is that observational studies may suffer from residual confounding. A review of evidence from different study designs, including experimental and quasi-experimental studies, suggests effects of breastfeeding on cognitive ability. <sup>63</sup>                                                                                                                                                                                                                                                                                                                                                                                                             |
| Childhood                                                                       | A wealth of observational evidence reports associations between various dimensions of parenting and child outcomes. We focused on dimensions of parenting that have been most commonly examined in these studies and that have been most consistently associated with a wide variety of outcomes; these parenting dimensions include cognitive stimulation, <sup>64,65</sup> warm-sensitive parenting, <sup>66–68</sup> household chaos, <sup>69,70</sup> health-parenting (i.e. parent efforts at instilling healthy habits in their children e.g. via limiting screen time or providing healthy foods), <sup>71,72</sup> and support with schooling. <sup>73</sup> These observational studies suffer from the same limitations as explained above, particularly the risk of residual confounding. However, there is some evidence from experimental and quasi-experimental designs to suggest a potential causal impact of these parenting dimensions for child outcomes, including evidence for effects of cognitive stimulation on child language outcomes, <sup>74,75</sup> warm-sensitive parenting on externalising |

|                                                                              |                                                                                                                                                                                                                                                                                                                                                                                                                                                                                                                                                                                                                                                                                                                                                                                                                                                                                               |
|------------------------------------------------------------------------------|-----------------------------------------------------------------------------------------------------------------------------------------------------------------------------------------------------------------------------------------------------------------------------------------------------------------------------------------------------------------------------------------------------------------------------------------------------------------------------------------------------------------------------------------------------------------------------------------------------------------------------------------------------------------------------------------------------------------------------------------------------------------------------------------------------------------------------------------------------------------------------------------------|
|                                                                              | problems, <sup>76-78</sup> household-chaos on externalising problems, <sup>79</sup> health-parenting on some child health outcomes, <sup>80,81</sup> and school support on academic achievement. <sup>82,83</sup>                                                                                                                                                                                                                                                                                                                                                                                                                                                                                                                                                                                                                                                                             |
| Adolescence                                                                  | One of the most well-researched aspects of parenting during adolescence is parental monitoring; numerous observational studies report associations between monitoring and offspring outcomes, particularly antisocial behaviour, <sup>67</sup> substance use and risky sexual behaviour, <sup>84</sup> and academic achievement. <sup>68</sup> Evidence from (quasi-)experimental research is more sparse, but suggests that parenting interventions during adolescence can reduce adolescents' risky substance-use and sexual behaviour. <sup>85,86</sup>                                                                                                                                                                                                                                                                                                                                    |
| Offspring adulthood                                                          | We focus on three common sources of intergenerational supports from parents to adult offspring: financial support, wealth inheritance, and childcare support. Perhaps unsurprisingly, previous research suggests that financial support and wealth inheritance increase offspring wealth, at least in the short term. <sup>87-89</sup> For the provision of childcare support to the children of adult offspring, there is evidence from survey studies suggesting that it affects the labor market participation of mothers, as well as parents' fertility decisions. <sup>90-92</sup>                                                                                                                                                                                                                                                                                                       |
| <b>Evidence for associations between children's genes and child outcomes</b> |                                                                                                                                                                                                                                                                                                                                                                                                                                                                                                                                                                                                                                                                                                                                                                                                                                                                                               |
|                                                                              | Decades of evidence from twin and adoption studies show genetic influences on various offspring outcomes, including physical health, mental health, behavioural and educational outcomes. <sup>93</sup> More recent evidence for genetic influences comes from genome-wide association studies (GWAS) that have identified associations between measured genetic variation and various outcomes. <sup>94</sup> Findings from GWAS studies may suffer from several sources of confounding, such as indirect genetic effects, assortative mating or population stratification. <sup>95</sup> However, evidence from analyses of siblings (which control for potent sources of confounding) suggest that even among siblings born to the same biological parents, genetic differences continue to be associated with outcomes (although the magnitude of effects tends to reduce). <sup>96</sup> |

685  
686  
687  
688  
689

690 **Supplementary Table 2.** Measurement of parental investment across cohorts.

|                    | Child age at assessments | Informant                         | Format                                               |
|--------------------|--------------------------|-----------------------------------|------------------------------------------------------|
| <b>Prenatal</b>    |                          |                                   |                                                      |
| ALSPAC             | 18w, 32w                 | Mother                            | Questionnaire                                        |
| E-Risk             | 2y                       | Mother                            | Questionnaire                                        |
| MCS                | 9m                       | Mother                            | Questionnaire                                        |
| <b>Infancy</b>     |                          |                                   |                                                      |
| ALSPAC             | 4wk, 6m, 1y              | Mother                            | Questionnaire                                        |
| E-Risk             | 2                        | Mother                            | Questionnaire                                        |
| MCS                | 9m                       | Mother                            | Questionnaire                                        |
| <b>Childhood</b>   |                          |                                   |                                                      |
| ALSPAC             | 1-12y                    | Mother                            | Questionnaire                                        |
| E-Risk             | 5y,7y,10y,12y            | Mother,<br>Interviewer            | Questionnaires<br>HOME observations<br>Speech sample |
| MCS                | 3y,5y,7y,11y             | Mother, Father,<br>Child, Teacher | Questionnaires                                       |
| Dunedin            | 3y                       | Mother or Father,<br>Interviewer  | Video observations<br>HOME observations              |
| <b>Adolescence</b> |                          |                                   |                                                      |
| ALSPAC             | 14y, 17y                 | Mother, Child                     | Questionnaire                                        |
| E-Risk             | 12y                      | Mother, Child                     | Questionnaire                                        |
| MCS                | 14y                      | Mother, Child                     | Questionnaire                                        |
| <b>Adulthood</b>   |                          |                                   |                                                      |
| WLS cohort         | na                       | Parent                            | Questionnaire                                        |
| HRS cohort         | na                       | Parent                            | Questionnaire                                        |

691 *Note:* ALSPAC = Avon Longitudinal Study of Parents and Children; E-Risk = Environmental Risk Longitudinal Twin Study; MCS =  
692 Millennium Cohort Study; HRS = Health and Retirement Study; WLS = Wisconsin Longitudinal Study

693 **Supplementary Table 3.** Associations between parental polygenic score and intergenerational supports to adult offspring across  
 694 models with adjustment for different sets of variables.  
 695

| Health and Retirement Study (HRS)  |                   |                   |                   |                   |
|------------------------------------|-------------------|-------------------|-------------------|-------------------|
|                                    | Model 1           | Model 2           | Model 3           | Model 4           |
|                                    | RR (95%CI)        | RR (95%CI)        | RR (95%CI)        | RR (95%CI)        |
| Financial support                  | 1.12 [1.10; 1.14] | 1.12 [1.10; 1.14] | 1.11 [1.09; 1.13] | 1.10 [1.08; 1.12] |
| Help with childcare                | 1.03 [1.01; 1.06] | 1.04 [1.02; 1.07] | 1.05 [1.02; 1.07] | 1.04 [1.01; 1.06] |
|                                    | $\beta$ (95%CI)   | $\beta$ (95%CI)   | $\beta$ (95%CI)   | $\beta$ (95%CI)   |
| Inheritance                        | 0.12 [0.11; 0.14] | 0.12 [0.11; 0.13] | 0.12 [0.11; 0.13] | 0.11 [0.10; 0.12] |
| Wisconsin Longitudinal Study (WLS) |                   |                   |                   |                   |
|                                    | Model 1           | Model 2           | Model 3           | Model 4           |
|                                    | RR (95%CI)        | RR (95%CI)        | RR (95%CI)        | RR (95%CI)        |
| Financial support                  | 1.06 [1.04; 1.09] | 1.07 [1.04; 1.09] | 1.07 [1.04; 1.10] | 1.07 [1.04; 1.09] |
| Help with childcare                | 1.10 [1.05; 1.14] | 1.11 [1.07; 1.15] | 1.11 [1.07; 1.16] | 1.11 [1.07; 1.15] |
| Inheritance                        | 1.00 [0.98; 1.02] | 1.00 [0.98; 1.02] | 1.00 [0.98; 1.02] | 1.00 [0.98; 1.02] |

696 *Note:* RR=Relative Risk;  $\beta$ =Standardized regression coefficient; CI=Confidence interval.  
 697 Model 1: Adjusted for wave/year, age, sex  
 698 Model 2: Adjusted for all the predictors as in Model 1, plus number of children (and, for childcare, proximity to children)  
 699 Model 3: Adjusted for all the predictors as in Model 2, plus labour force status  
 700 Model 4: Adjusted for all the predictors as in Model 2, plus assets/net worth  
 701  
 702  
 703  
 704



705 **Supplementary Table 4.** Associations between parental polygenic score and parenting, before (Model 1) and after (Model 2)  
 706 adjusting for parental educational attainment.

|                       | ALSPAC              |                      | E-Risk            |                    |
|-----------------------|---------------------|----------------------|-------------------|--------------------|
|                       | Model 1*            | Model 2^             | Model 1           | Model 2            |
| <b>Prenatal</b>       | RR (95%CI)          | RR (95%CI)           | RR (95%CI)        | RR (95%CI)         |
| Cigarette smoking     | 0.76 [0.72; 0.80]   | 0.91 [0.85; 0.97]    | 0.85 [0.75; 0.97] | 0.96 [0.84; 1.11]  |
| Heavy drinking        | 0.86 [0.82; 0.91]   | 0.93 [0.87; 0.98]    | -                 | -                  |
| <b>Infancy</b>        | RR (95%CI)          | RR (95%CI)           | RR (95%CI)        | RR (95%CI)         |
| Breastfeeding         | 1.11 [1.08; 1.14]   | 1.03 [1.00; 1.07]    | 1.24 [1.13; 1.37] | 1.12 [1.01; 1.24]  |
| <b>Childhood</b>      | $\beta$ (95%CI)     | $\beta$ (95%CI)      | $\beta$ (95%CI)   | $\beta$ (95%CI)    |
| Cognitive stimulation | 0.22 [0.20; 0.25]   | 0.08 [0.05; 0.10]    | 0.26 [0.20; 0.32] | 0.09 [0.04; 0.15]  |
| Warmth, sensitivity   | -0.01 [-0.04; 0.02] | 0.00 [-0.04; 0.03]   | 0.17 [0.11; 0.24] | 0.07 [0.01; 0.14]  |
| Household chaos       | 0.22 [0.19; 0.24]   | 0.09 [0.25; 0.30]    | 0.18 [0.11; 0.24] | 0.04 [-0.02; 0.10] |
| Health-parenting      | 0.30 [0.27; 0.32]   | 0.14 [0.11; 0.17]    | 0.21 [0.14; 0.27] | 0.07 [0.00; 0.13]  |
| School support        | 0.20 [0.18; 0.23]   | 0.08 [0.05; 0.11]    | -                 | -                  |
| <b>Adolescence</b>    | $\beta$ (95%CI)     | $\beta$ (95%CI)      | $\beta$ (95%CI)   | $\beta$ (95%CI)    |
| Monitoring            | -0.02 [-0.05; 0.02] | -0.05 [-0.08; -0.01] | 0.11 [0.04; 0.17] | 0.03 [-0.03; 0.10] |
|                       | HRS                 |                      | WLS               |                    |
|                       | Model 1             | Model 2              | Model 1           | Model 2            |
| <b>Adulthood</b>      | RR (95%CI)          | RR (95%CI)           | RR (95%CI)        | RR (95%CI)         |
| Financial support     | 1.10 [1.08; 1.12]   | 1.04 [1.02; 1.06]    | 1.07 [1.04; 1.09] | 1.01 [0.98; 1.04]  |
| Childcare support     | 1.04 [1.01; 1.06]   | 1.01 [0.99; 1.04]    | 1.11 [1.07; 1.15] | 1.08 [1.04; 1.12]  |
| <b>Inheritance</b>    | $\beta$ (95%CI)     | $\beta$ (95%CI)      | RR (95%CI)        | RR (95%CI)         |
|                       | 0.11 [0.10; 0.12]   | 0.04 [0.03; 0.06]    | 1.00 [0.98; 1.02] | 1.01 [0.99; 1.03]  |

707

|                       | Dunedin           |                    | MCS               |                    |
|-----------------------|-------------------|--------------------|-------------------|--------------------|
|                       | Model 1           | Model 2            | Model 1           | Model 2            |
| <b>Prenatal</b>       | RR (95%CI)        | RR (95%CI)         | RR (95%CI)        | RR (95%CI)         |
| Cigarette smoking     | -                 | -                  | 0.75 [0.71; 0.80] | 0.93 [0.88; 0.99]  |
| Alcohol drinking      | -                 | -                  | 0.97 [0.83; 1.12] | 1.08 [0.91; 1.28]  |
| <b>Infancy</b>        | RR (95%CI)        | RR (95%CI)         | RR (95%CI)        | RR (95%CI)         |
| Breastfeeding         | -                 | -                  | 1.12 [1.10; 1.14] | 1.05 [1.03; 1.07]  |
| <b>Childhood</b>      | $\beta$ (95%CI)   | $\beta$ (95%CI)    | $\beta$ (95%CI)   | $\beta$ (95%CI)    |
| Cognitive stimulation | 0.11 [0.01; 0.22] | 0.00 [-0.10; 0.10] | 0.16 [0.13; 0.19] | 0.07 [0.04; 0.11]  |
| Warmth, sensitivity   | 0.15 [0.05; 0.26] | 0.05 [-0.05; 0.15] | 0.09 [0.05; 0.12] | 0.03 [-0.01; 0.06] |
| Household chaos       | -                 | -                  | 0.14 [0.11; 0.17] | 0.06 [0.02; 0.09]  |
| Health-parenting      | -                 | -                  | 0.21 [0.18; 0.24] | 0.08 [0.05; 0.11]  |
| School support        | -                 | -                  | 0.09 [0.06; 0.12] | 0.02 [-0.01; 0.06] |
| <b>Adolescence</b>    | $\beta$ (95%CI)   | $\beta$ (95%CI)    | $\beta$ (95%CI)   | $\beta$ (95%CI)    |
| Monitoring            | -                 | -                  | 0.09 [0.05; 0.12] | 0.04 [0.01; 0.08]  |

709 *Note:* ALSPAC=Avon Longitudinal Study of Parents and Children; E-Risk=Environmental Risk Longitudinal Twin Study;  
710 MCS=Millennium Cohort Study; HRS=Health and Retirement Study; WLS=Wisconsin Longitudinal Study. RR=Relative Risk;  
711  $\beta$ =Standardized regression coefficient; CI=Confidence interval. Note, the N in these analyses was restricted to every parent who had  
712 valid data for polygenic score and parenting, as well as for educational attainment, so Ns (and estimates) may differ slightly from  
713 those in the main analyses.

714 \* Model 1: Unadjusted for education (predictors are polygenic score, sex, and for WLS and HRS, age, wave/year, sex, number of  
715 children, physical proximity, labor force status and net worth/assets), these estimates might at times differ very slightly from those  
716 reported in the main manuscript, because some individuals included in the main analyses had available data for educational  
717 attainment.

718 ^ Model 2: Adjusted for parental education (i.e. parental educational attainment is added to Model 1 as a predictor).

719

720 **SUPPLEMENTARY REFERENCES**

721

722

- 723 1. Trouton, A., Spinath, F. M. & Plomin, R. Twins early development study (TEDS): A  
724 multivariate, longitudinal genetic investigation of language, cognition and behavior  
725 problems in childhood. *Twin Res.* **5**, 444–448 (2002).
- 726 2. Moffitt, T. E. & E-Risk Study Team. Teen-aged mothers in contemporary Britain. *J. Child*  
727 *Psychol. Psychiatry* **43**, 727–42 (2002).
- 728 3. Odgers, C. L., Caspi, A., Bates, C. J., Sampson, R. J. & Moffitt, T. E. Systematic social  
729 observation of children’s neighborhoods using Google Street View: A reliable and cost-  
730 effective method. *J. child Psychol. psychiatry* **53**, 1009–17 (2012).
- 731 4. Poulton, R., Moffitt, T. E. & Silva, P. A. The Dunedin Multidisciplinary Health and  
732 Development Study: Overview of the first 40 years, with an eye to the future. *Soc.*  
733 *Psychiatry Psychiatr. Epidemiol.* **50**, 679–93 (2015).
- 734 5. Belsky, J., Sligo, J., Jaffee, S. R., Woodward, L. & Silva, P. A. Intergenerational  
735 transmission of warm-sensitive-stimulating parenting: A prospective study of mothers and  
736 fathers of 3-year-olds. *Child Dev.* **76**, 384–396 (2005).
- 737 6. Fraser, A. *et al.* Cohort profile: The Avon longitudinal study of parents and children:  
738 ALSPAC mothers cohort. *Int. J. Epidemiol.* **42**, 97–110 (2013).
- 739 7. Boyd, A. *et al.* Cohort profile: The ‘Children of the 90s’-The index offspring of the Avon  
740 longitudinal study of parents and children. *Int. J. Epidemiol.* **42**, 111–127 (2013).
- 741 8. Joshi, H. & Fitzsimons, E. The Millennium Cohort Study: The making of a multi-purpose  
742 resource for social science and policy. *Longit. Life Course Stud.* **7**, 409–430 (2016).
- 743 9. Connelly, R. & Platt, L. Cohort profile: UK Millennium Cohort Study (MCS). *Int. J.*  
744 *Epidemiol.* **43**, 1719–1725 (2014).
- 745 10. Sonnega, A. *et al.* Cohort profile: The Health and Retirement Study (HRS). *Int. J.*  
746 *Epidemiol.* **43**, 576–585 (2014).
- 747 11. Herd, P., Carr, D. & Roan, C. Cohort profile: Wisconsin Longitudinal Study (WLS). *Int.*  
748 *J. Epidemiol.* **43**, 34–41 (2014).
- 749 12. Howie, B. N., Donnelly, P. & Marchini, J. A flexible and accurate genotype imputation  
750 method for the next generation of genome-wide association studies. *Plos Genet.* **5**,  
751 e1000529 (2009).
- 752 13. Abecasis, G. R. *et al.* An integrated map of genetic variation from 1,092 human genomes.  
753 *Nature* **491**, 56–65 (2012).
- 754 14. Sherry, S. T. dbSNP: The NCBI database of genetic variation. *Nucleic Acids Res.* **29**, 308–  
755 311 (2001).
- 756 15. Fitzsimons, E. *et al.* *Collection of DNA samples and genetic data at scale in the UK*  
757 *Millennium Cohort Study.* (2020).
- 758 16. Laurie, C. C. *et al.* Quality control and quality assurance in genotypic data for genome-  
759 wide association studies. *Genet. Epidemiol.* **34**, 591–602 (2010).
- 760 17. McCarthy, S. *et al.* A reference panel of 64,976 haplotypes for genotype imputation. *Nat.*  
761 *Genet.* **2016 4810 48**, 1279–1283 (2016).
- 762 18. Lee, J. J. *et al.* Gene discovery and polygenic prediction from a genome-wide association  
763 study of educational attainment in 1.1 million individuals. *Nat. Genet.* **50**, 1112–1121  
764 (2018).
- 765 19. Dudbridge, F. Power and predictive accuracy of polygenic risk scores. *PLoS Genet.* **9**,

- 766 e1003348 (2013).
- 767 20. Euesden, J., Lewis, C. M. & O'Reilly, P. F. PRSice: Polygenic Risk Score software.  
768 *Bioinformatics* **31**, 1466–1468 (2015).
- 769 21. Vilhjálmsson, B. J. *et al.* Modeling linkage disequilibrium increases accuracy of polygenic  
770 risk scores. *Am. J. Hum. Genet.* **97**, 576–592 (2015).
- 771 22. Turley, P. *et al.* Multi-trait analysis of genome-wide association summary statistics using  
772 MTAG. *Nat. Genet.* **50**, 229–237 (2018).
- 773 23. Price, A. L. *et al.* Principal components analysis corrects for stratification in genome-wide  
774 association studies. *Nat. Genet.* **38**, 904–909 (2006).
- 775 24. Ward, C., Lewis, S. & Coleman, T. Prevalence of maternal smoking and environmental  
776 tobacco smoke exposure during pregnancy and impact on birth weight: retrospective study  
777 using Millennium Cohort. *BMC Public Heal.* **7**, 1–7 (2007).
- 778 25. Wertz, J. *et al.* Using DNA from mothers and children to study parental investment in  
779 children's educational attainment. *Child Dev.* **91**, 1745–1761 (2020).
- 780 26. Bradley, R. H., Caldwell, B. M., Rock, S. L., Hamrick, H. M. & Harris, P. Home  
781 Observation for Measurement of the Environment: Development of a Home Inventory for  
782 use with families having children 6 to 10 years old. *Contemp. Educ. Psychol.* **13**, 58–71  
783 (1988).
- 784 27. Caldwell, B. M. & Bradley, R. H. *Home observation for measurement of the environment.*  
785 (University of Arkansas at Little Rock, 1984).
- 786 28. Wertz, J. *et al.* Genetics of nurture: A test of the hypothesis that parents' genetics predict  
787 their observed caregiving. *Dev. Psychol.* **55**, 1461–1472 (2019).
- 788 29. National Institute of Child Health and Human Development Early Child Care Research  
789 Network. Child care and mother-child interaction in the first 3 years of life. *Dev. Psychol.*  
790 **35**, 1399–1413 (1999).
- 791 30. Magaña, A. B. *et al.* A brief method for assessing expressed emotion in relatives of  
792 psychiatric patients. *Psychiatry Res.* **17**, 203–212 (1986).
- 793 31. Caspi, A. *et al.* Maternal expressed emotion predicts children's antisocial behavior  
794 problems: using monozygotic-twin differences to identify environmental effects on  
795 behavioral development. *Dev. Psychol.* **40**, 149–61 (2004).
- 796 32. Robinson, E. A. & Eyberg, S. M. The dyadic parent-child interaction coding system:  
797 Standardization and validation. *J. Consult. Clin. Psychol.* **49**, 245–250 (1981).
- 798 33. Webster-Stratton, C. Preventing conduct problems in Head Start children: Strengthening  
799 parenting competencies. *J. Consult. Clin. Psychol.* **66**, 715–730 (1998).
- 800 34. Dunn, J., Deater-Deckard, K., Pickering, K., O'Connor, T. G. & Golding, J. Children's  
801 adjustment and prosocial behaviour in step-, single-parent, and non-stepfamily settings:  
802 Findings from a community study. *J. Child Psychol. Psychiatry* **39**, 1083–1095 (1998).
- 803 35. Johnson, J., Atkinson, M. & Rosenberg, R. *Millennium cohort study: Psychological,*  
804 *developmental and health inventories.* (2015).
- 805 36. Matheny, A. P., Wachs, T. D., Ludwig, J. L. & Phillips, K. Bringing order out of chaos:  
806 Psychometric characteristics of the confusion, hubbub, and order scale. *J. Appl. Dev.*  
807 *Psychol.* **16**, 429–444 (1995).
- 808 37. Jensen, E. W., James, S. A., Boyce, W. T. & Hartnett, S. A. The family routines  
809 inventory: Development and validation. *Soc. Sci. Med.* **17**, 201–211 (1983).
- 810 38. Fiese, B. H. & Kline, C. A. Development of the Family Ritual Questionnaire: Initial  
811 reliability and validation studies. *J. Fam. Psychol.* **6**, 290–299 (1993).

- 812 39. Evans, G. W., Gonnella, C., Marcynyszyn, L. a, Gentile, L. & Salpekar, N. The role of  
813 chaos in poverty and children’s socioemotional adjustment. *Psychol. Sci.* **16**, 560–5  
814 (2005).
- 815 40. Alati, R. *et al.* Effect of prenatal alcohol exposure on childhood academic Outcomes:  
816 Contrasting maternal and paternal associations in the ALSPAC study. *PLoS One* **8**,  
817 e74844 (2013).
- 818 41. Wertz, J. *et al.* Vital personality scores and healthy aging: Life-course associations and  
819 familial transmission. *Soc. Sci. Med.* **285**, 114283 (2021).
- 820 42. Northstone, K. & Emmett, P. M. Are dietary patterns stable throughout early and mid-  
821 childhood? A birth cohort study. *Br. J. Nutr.* **100**, 1069–1076 (2008).
- 822 43. Wertz, J. *et al.* Parental monitoring and knowledge: Testing bidirectional associations with  
823 youths’ antisocial behavior. *Dev. Psychopathol.* **28**, 623–638 (2016).
- 824 44. Stattin, H. & Kerr, M. Parental monitoring: a reinterpretation. *Child Dev.* **71**, 1072–85  
825 (2000).
- 826 45. StataCorp. *Stata Statistical Software: Release 17.* (StataCorp LLC, 2021).
- 827 46. Muthén, L. K. & Muthén, B. O. *Mplus User’s Guide. Eighth Edition.* (Muthén &  
828 Muthén).
- 829 47. Kenny, D. A., Kashy, D. A. & Cook, W. L. *Dyadic data analysis.* (Guildford, 2006).
- 830 48. Ketende, S. C. & Jones, E. M. *User Guide to Analysing MCS Data Using STATA.* (2011).
- 831 49. Burke, H. *et al.* Prenatal and passive smoke exposure and incidence of asthma and  
832 wheeze: Systematic review and meta-analysis. *Pediatrics* **129**, 735–744 (2012).
- 833 50. Pereira, P. P. da S., Da Mata, F. A. F., Figueiredo, A. C. G., de Andrade, K. R. C. &  
834 Pereira, M. G. Maternal active smoking during pregnancy and low birth weight in the  
835 americas: A systematic review and meta-analysis. *Nicotine and Tobacco Research* **19**,  
836 497–505 (2017).
- 837 51. Oken, E., Levitan, E. B. & Gillman, M. W. Maternal smoking during pregnancy and child  
838 overweight: Systematic review and meta-analysis. *Int. J. Obes.* **32**, 201–210 (2008).
- 839 52. Wakschlag, L. S., Pickett, K. E., Cook, E., Benowitz, N. L. & Leventhal, B. L. Maternal  
840 smoking during pregnancy and severe antisocial behavior in offspring: A review. *Am. J.*  
841 *Public Health* **92**, 966–974 (2002).
- 842 53. DiFranza, J. R., Aligne, C. A. & Weitzman, M. Prenatal and postnatal environmental  
843 tobacco smoke exposure and children’s health. *Pediatrics* **113**, 1007–1015 (2004).
- 844 54. Rice, F., Langley, K., Woodford, C., Davey Smith, G. & Thapar, A. Identifying the  
845 contribution of prenatal risk factors to offspring development and psychopathology: What  
846 designs to use and a critique of literature on maternal smoking and stress in pregnancy.  
847 *Dev. Psychopathol.* **30**, 1107–1128 (2018).
- 848 55. Dasgupta, K., Ghimire, K. M. & Pacheco, G. How heavy is the price of smoking?  
849 Estimating the effects of prenatal smoking on child weight outcomes. *Appl. Econ.* **54**,  
850 5159–5175 (2022).
- 851 56. Veisani, Y., Jenabi, E., Delpisheh, A. & Khazaei, S. Effect of prenatal smoking cessation  
852 interventions on birth weight: meta-analysis. *J. Matern. Neonatal Med.* **32**, 332–338  
853 (2019).
- 854 57. Easey, K. E., Dyer, M. L., Timpson, N. J. & Munafò, M. R. Prenatal alcohol exposure and  
855 offspring mental health: A systematic review. *Drug Alcohol Depend.* **197**, 344–353  
856 (2019).
- 857 58. Patra, J. *et al.* Dose-response relationship between alcohol consumption before and during

- 858 pregnancy and the risks of low birthweight, preterm birth and small for gestational age  
859 (SGA)-a systematic review and meta-analyses. *BJOG An Int. J. Obstet. Gynaecol.* **118**,  
860 1411–1421 (2011).
- 861 59. Mamluk, L. *et al.* Evidence of detrimental effects of prenatal alcohol exposure on  
862 offspring birthweight and neurodevelopment from a systematic review of quasi-  
863 experimental studies. *Int. J. Epidemiol.* **49**, 1972–1995 (2020).
- 864 60. Yan, J., Liu, L., Zhu, Y., Huang, G. & Wang, P. P. The association between breastfeeding  
865 and childhood obesity: A meta-analysis. *BMC Public Health* **14**, 1–11 (2014).
- 866 61. Dogaru, C. M., Nyffenegger, D., Pescatore, A. M., Spycher, B. D. & Kuehni, C. E.  
867 Breastfeeding and childhood asthma: Systematic review and meta-Analysis. *Am. J.*  
868 *Epidemiol.* **179**, 1153–1167 (2014).
- 869 62. Horta, B. L., Loret De Mola, C. & Victora, C. G. Breastfeeding and intelligence: A  
870 systematic review and meta-analysis. *Acta Paediatr. Int. J. Paediatr.* **104**, 14–19 (2015).
- 871 63. Smithers, L. G., Kramer, M. S. & Lynch, J. W. Effects of breastfeeding on obesity and  
872 intelligence: Causal insights from different study designs. *JAMA Pediatr.* **169**, 707–708  
873 (2015).
- 874 64. Anderson, N. J., Graham, S. A., Prime, H., Jenkins, J. M. & Madigan, S. Linking Quality  
875 and Quantity of Parental Linguistic Input to Child Language Skills: A Meta-Analysis.  
876 *Child Dev.* **92**, 484–501 (2021).
- 877 65. Han, J., Cui, N., Lyu, P. & Li, Y. Early-life home environment and child cognitive  
878 function: A meta-analysis. *Pers. Individ. Dif.* **200**, 111905 (2023).
- 879 66. Madigan, S. *et al.* Parenting behavior and child language: A Meta-analysis. *Pediatrics*  
880 **144**, (2019).
- 881 67. Hoeve, M. *et al.* The relationship between parenting and delinquency: a meta-analysis. *J.*  
882 *Abnorm. Child Psychol.* **37**, 749–75 (2009).
- 883 68. Pinquart, M. Associations of parenting styles and dimensions with academic achievement  
884 in children and adolescents: A Meta-analysis. *Educ. Psychol. Rev.* **28**, 475–493 (2016).
- 885 69. Marsh, S., Dobson, R. & Maddison, R. The relationship between household chaos and  
886 child, parent, and family outcomes: A systematic scoping review. *BMC Public Health* **20**,  
887 1–27 (2020).
- 888 70. Andrews, K., Atkinson, L., Harris, M. & Gonzalez, A. Examining the effects of household  
889 chaos on child executive functions: A meta-analysis. *Psychol. Bull.* **147**, 16–32 (2021).
- 890 71. Madigan, S., McArthur, B. A., Anhorn, C., Eirich, R. & Christakis, D. A. Associations  
891 between screen use and child language skills: A systematic review and meta-analysis.  
892 *JAMA Pediatr.* **174**, 665–675 (2020).
- 893 72. Collett, B. R. *et al.* Observed child and parent toothbrushing behaviors and child oral  
894 health. *Int. J. Paediatr. Dent.* **26**, 184–192 (2016).
- 895 73. Fan, X. & Chen, M. Parental involvement and students' academic achievement: A meta-  
896 analysis. *Educ. Psychol. Rev.* **13**, 1–22 (2001).
- 897 74. Dowdall, N. *et al.* Shared picture book reading interventions for child language  
898 development: A systematic review and meta-analysis. *Child Dev.* **91**, e383–e399 (2020).
- 899 75. Noble, C. *et al.* The impact of shared book reading on children's language skills: A meta-  
900 analysis. *Educ. Res. Rev.* **28**, 100290 (2019).
- 901 76. Furlong, M. *et al.* Behavioural and cognitive-behavioural group-based parenting  
902 programmes for early-onset conduct problems in children aged 3 to 12 years. *Cochrane*  
903 *Database Syst. Rev.* (2012). doi:10.1002/14651858.cd008225.pub2

- 904 77. Barlow, J., Bergman, H., Kornor, H., Wei, Y. & Bennett, C. Group-based parent training  
905 programmes for improving emotional and behavioural adjustment in children. *Cochrane*  
906 *Database Syst. Rev.* 2016, CD003680 (2016). doi:10.1111/ijn.12540
- 907 78. Dretzke, J. *et al.* The clinical effectiveness of different parenting programmes for children  
908 with conduct problems: A systematic review of randomised controlled trials. *Child*  
909 *Adolesc. Psychiatry Ment. Health* **3**, (2009).
- 910 79. Jaffee, S. R., Hanscombe, K. B., Haworth, C. M. A., Davis, O. S. P. & Plomin, R. Chaotic  
911 homes and children's disruptive behavior: A longitudinal cross-lagged twin study.  
912 *Psychol. Sci.* **23**, 643–650 (2012).
- 913 80. Aliakbari, E. *et al.* Home-based toothbrushing interventions for parents of young children  
914 to reduce dental caries: A systematic review. *Int. J. Paediatr. Dent.* **31**, 37–79 (2021).
- 915 81. Martin, K. B., Bednarz, J. M. & Aromataris, E. C. Interventions to control children's  
916 screen use and their effect on sleep: A systematic review and meta-analysis. *J. Sleep Res.*  
917 **30**, 1–17 (2021).
- 918 82. Valcan, D. S., Davis, H. & Pino-Pasternak, D. Parental behaviours predicting early  
919 childhood executive functions: A meta-analysis. *Educ. Psychol. Rev.* **30**, 607–649 (2018).
- 920 83. Avvisati, F., Gurgand, M., Guyon, N. & Maurin, E. Getting parents involved: A field  
921 experiment in deprived schools. *Rev. Econ. Stud.* **81**, 57–83 (2014).
- 922 84. Dittus, P. J. *et al.* Parental monitoring and its associations with adolescent sexual risk  
923 behavior: A meta-analysis. *Pediatrics* **136**, e1587–e1599 (2015).
- 924 85. Allen, M. L. *et al.* Effective parenting interventions to reduce youth substance use: A  
925 systematic review. *Pediatrics* **138**, (2016).
- 926 86. Widman, L., Evans, R., Javidi, H. & Choukas-Bradley, S. Assessment of parent-based  
927 interventions for adolescent sexual health: A systematic review and meta-analysis. *JAMA*  
928 *Pediatr.* **173**, 866–877 (2019).
- 929 87. Boserup, S. H., Kopczuk, W. & Kreiner, C. T. The role of bequests in shaping wealth  
930 inequality: Evidence from Danish wealth records. *Am. Econ. Rev.* **106**, 656–661 (2016).
- 931 88. Spiteri, J. & von Brockdorff, P. Household Wealth and Inheritance Transfers: Evidence  
932 from the Euro Area. *J. Fam. Econ. Issues* (2022). doi:10.1007/s10834-022-09861-0
- 933 89. Druedahl, J. & Martinello, A. *Long-run saving dynamics: Evidence from unexpected*  
934 *inheritances.* (2017).
- 935 90. Thomese, F. & Liefbroer, A. C. Child care and child births: The role of grandparents in  
936 the Netherlands. *J. Marriage Fam.* **75**, 403–421 (2013).
- 937 91. Kanji, S. Grandparent Care: A key factor in mothers' labour force participation in the UK.  
938 *J. Soc. Policy* **47**, 523–542 (2018).
- 939 92. Posadas, J. & Vidal-Fernandez, M. Grandparents' childcare and female labor force  
940 participation. *IZA J. Labor Policy* **2**, 1–20 (2013).
- 941 93. Polderman, T. J. C. *et al.* Meta-analysis of the heritability of human traits based on fifty  
942 years of twin studies. *Nat. Genet.* **47**, 702–709 (2015).
- 943 94. Visscher, P. M. *et al.* 10 years of GWAS discovery: Biology, function, and translation.  
944 *Am. J. Hum. Genet.* **101**, 5–22 (2017).
- 945 95. Young, A. I., Benonisdottir, S., Przeworski, M. & Kong, A. Deconstructing the sources of  
946 genotype-phenotype associations in humans. *Science (80-. )*. **365**, 1396–1400 (2019).
- 947 96. Howe, L. J. *et al.* Within-sibship genome-wide association analyses decrease bias in  
948 estimates of direct genetic effects. *Nat. Genet.* **54**, 581–592 (2022).
- 949
